# Supplementary material
Source: Springer Nature journal article supplement (https://www.springermedizin.de/resource/supplementary/13033_2011_112_MOESM4_ESM.pdf/9651880)

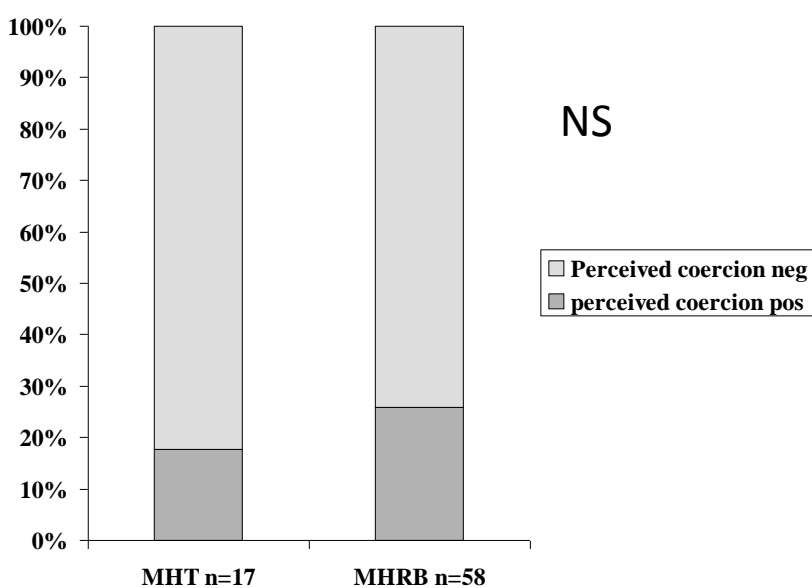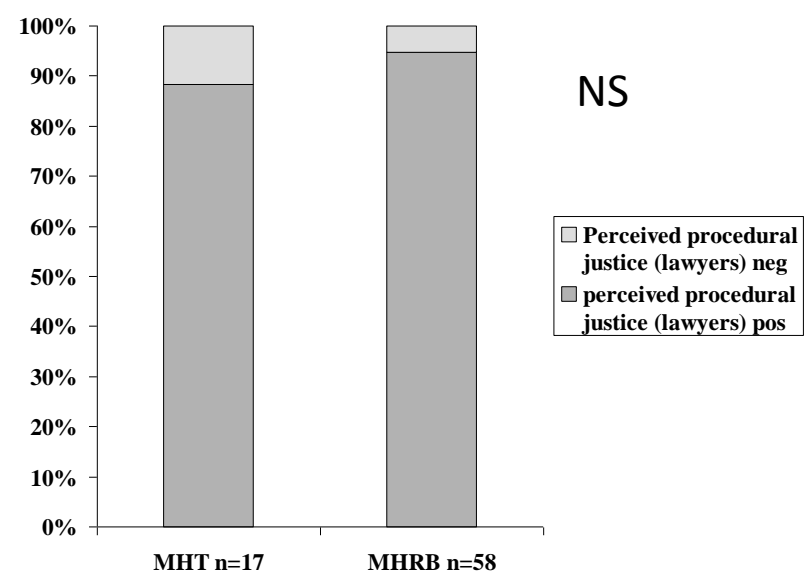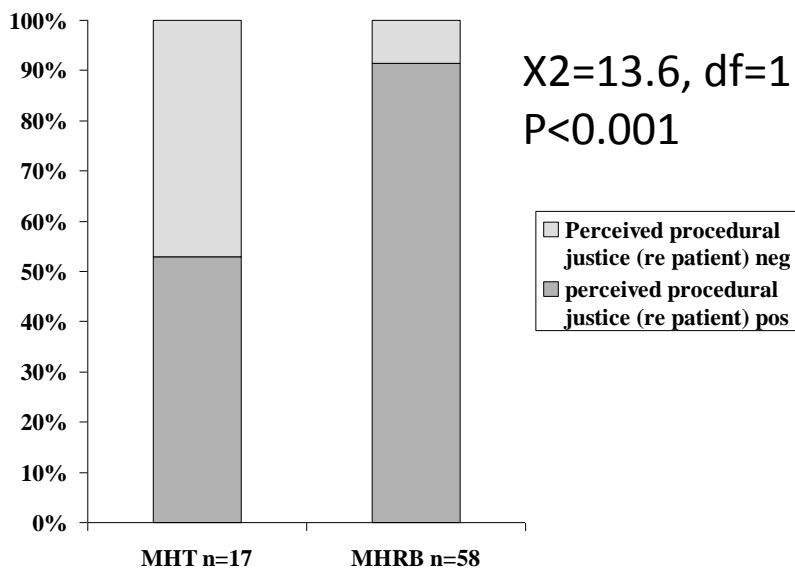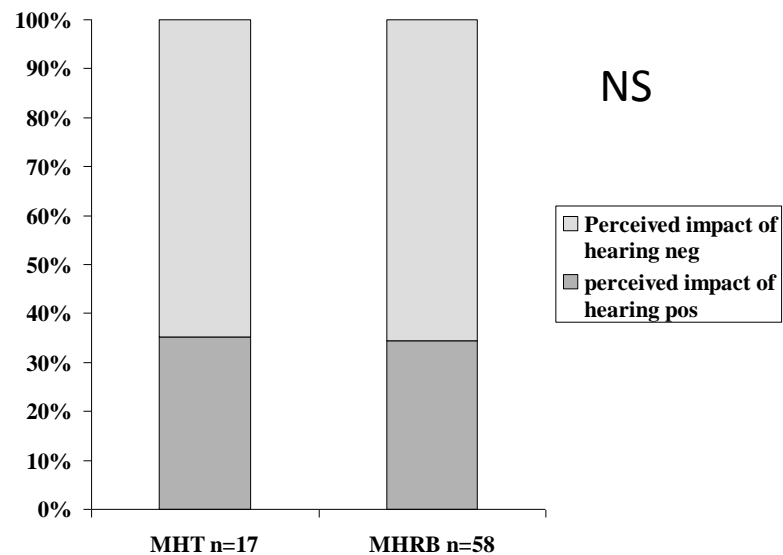

Supplement: MOESM4 [file 9651880]
